1 **Title: Observed Antibody Space: a resource for data mining next generation sequencing antibody**  
2 **repertoires.**

3  
4 Aleksandr Kovaltsuk<sup>1</sup>, Jinwoo Leem<sup>1</sup>, Sebastian Kelm<sup>2</sup>, James Snowden<sup>2</sup>, Charlotte M. Deane<sup>1,\*</sup>, Konrad  
5 Krawczyk<sup>1,\*</sup>

6

7 1. University of Oxford, Department of Statistics, Oxford, UK

8 2. UCB Pharma, Slough, UK

9 \* to whom the correspondence should be addressed,

10 [deane@stats.ox.ac.uk](mailto:deane@stats.ox.ac.uk)

11 [konrad@proteincontact.org](mailto:konrad@proteincontact.org)

12

13 **Abstract.** Antibodies are immune system proteins that recognize noxious molecules for elimination.  
14 Their sequence diversity and binding versatility have made antibodies the primary class of  
15 biopharmaceuticals. Recently it has become possible to query their immense natural diversity using  
16 next-generation sequencing of immunoglobulin gene repertoires (Ig-seq). However, Ig-seq outputs are  
17 currently fragmented across repositories and tend to be presented as raw nucleotide reads, which  
18 means nontrivial effort is required to reuse the data for analysis. To address this issue, we have  
19 collected Ig-seq outputs from 53 studies, covering more than half a billion antibody sequences across  
20 diverse immune states, organisms and individuals. We have sorted, cleaned, annotated, translated and  
21 numbered these sequences and make the data available via our Observed Antibody Space (OAS)  
22 resource at [antibodymap.org](http://antibodymap.org). The data within OAS will be regularly updated with newly released Ig-seq  
23 datasets. We believe OAS will facilitate data mining of immune repertoires for improved understanding  
24 of the immune system and development of better biotherapeutics.

25

26 **1. Introduction**

27

28 Antibodies (or B-cell receptors) are protein products of B-cells and primary actors of adaptive immunity  
29 in jawed vertebrates<sup>1</sup>. They are highly malleable molecules that can bind to virtually any antigen. An  
30 organism holds a great variety of these molecules increasing the probability that an arbitrary antigen  
31 can be recognized by an antibody, initiating an immune response<sup>2</sup>. Owing to their binding malleability

32 they are the most prominent class of reagents and biotherapeutics<sup>3,4</sup>. Continued successful exploitation  
33 of these molecules relies on our ability to discern the functional diversity of antibody repertoires<sup>5-7</sup>.

34  
35 Next-generation sequencing of immunoglobulin gene repertoires (Ig-seq) has enabled researchers to  
36 take snapshots of millions of sequences at a time across individuals, diverse organisms and different  
37 immune states<sup>8,9</sup>. The ability to analyze millions of antibody sequences has the potential to uncover the  
38 mechanics of the immune response to any antigen<sup>10,11</sup> and dysfunctions of the immune system itself<sup>12</sup>.

39  
40 Many previous studies have addressed the issue of antibody diversity, contributing invaluable evidence  
41 to the dynamics of human immune systems<sup>13</sup>. Numerous analyses have focused on the frequencies of  
42 V(D)J gene usages, which can offer insights into creating biased antibody libraries for therapeutic  
43 applications<sup>14-16</sup>. Another therapeutic application of antibody repertoire analysis is advancing vaccine  
44 design by comparative longitudinal studies of pre- and post-antigen challenge experiments<sup>10,11,17-22</sup>.  
45 Such comparative studies have shown that different individuals can converge on the same antibody  
46 sequence against a given vaccine<sup>11,19</sup>. Due to sequencing limitations, these analyses have focused on  
47 heavy or light chains separately, whereas one ought to study the paired repertoire to obtain a deeper  
48 insight of the antibody diversity<sup>23</sup>.

49  
50 Technical advances in sequencing technology have outpaced storage and analysis pipelines<sup>24,25</sup>. This has  
51 meant that the outputs of Ig-seq studies are fragmented across repositories making it difficult to  
52 perform large-scale data mining of antibody repertoires<sup>25</sup>. Metadata such as isotype, age or subject  
53 identifiers are not typically standardized, therefore extraction of specific subsets of antibody repertoires  
54 for comparative analyses is challenging. Furthermore, the data are typically deposited as raw nucleotide  
55 reads. It requires non-trivial *ad hoc* effort to convert such raw reads to amino acid sequences that  
56 ultimately dictate the molecular structure and antigen-recognition. Some of these issues are addressed  
57 by services that provide Ig-seq-specific data deposition and analysis pipelines such as Immport  
58 (<http://immport.org>)<sup>26,27</sup>, or ImmunoseqAnalyzer (<http://clients.adaptivebiotech.com/>), IReceptor  
59 (<http://ireceptor.irmacs.sfu.ca/>) or VDJSerVer (<http://vdjserver.org>)<sup>28</sup>. The IReceptor and the VDJSerVer  
60 are the main resources that fall under the umbrella of the organized effort by the Adaptive Immune  
61 Receptor Repertoire (AIRR) Community to provide standardized deposition and analysis pipelines for the  
62 Ig-seq outputs<sup>24</sup>. These services chiefly focus on facilitating bulk deposition of raw data to perform  
63 standardized sequencing analyses. Ultimately, because immunoinformatics is not the chief focus of such

64 services, bulk data download from such websites is limited and converting the raw nucleotide data  
65 obtained into format suitable for analysis still requires non-trivial effort.

66  
67 To address these issues, we have created the Observed Antibody Space (OAS) resource that allows large-  
68 scale data mining of antibody repertoires. We have collected the raw outputs of 53 Ig-seq experiments  
69 covering over half a billion sequences. We have organized the sequences by metadata such as organism,  
70 isotype, B-cell type and source, and the immune status of B-cell donors to facilitate bulk retrieval of  
71 specific subsets for comparative analyses. We have converted all of the Ig-seq sequences to amino acids  
72 and numbered them using the IMGT scheme. The data is available for querying or bulk download at  
73 <http://antibodymap.org>. We believe that OAS will facilitate data mining antibody repertoires for  
74 improved understanding of the dynamics of the immune system and thus better engineering of  
75 biotherapeutics.

76

## 77 **2. Materials and Methods**

78

79 A list of study accession codes of publically available Ig-seq datasets were obtained via a literature  
80 review. The majority of raw reads were downloaded from the European Nucleotide Archive (ENA)<sup>29</sup> and  
81 the National Center for Biotechnology Information (NCBI) websites<sup>30</sup>. In a small number of cases,  
82 another public Ig-seq repository was specified e.g.<sup>14,31-33</sup>. Metadata were manually extracted from the  
83 deposited datasets and arranged in a reproducible format.

84

85 The downloaded FASTQ files were processed depending on the sequencing platform. Paired raw  
86 Illumina reads were assembled with FLASH<sup>34</sup>. The assembled antibody sequences were converted to the  
87 FASTA format using FASTX-toolkit<sup>35</sup>. As raw reads from Roche 454 are not paired, these FASTQ files  
88 were directly converted to the FASTA format with the FASTX-toolkit.

89

90 The heavy chain sequences were automatically annotated with isotype information unless such data was  
91 given in the corresponding publication. Automatic isotype annotation was performed by aligning the  
92 constant heavy domain 1 (CH1) of any given antibody sequence against the IMGT isotype reference<sup>36</sup> of  
93 the respective species using the Smith-Waterman algorithm<sup>37</sup>. We assigned score of two for a  
94 nucleotide match, and a score of minus one for a nucleotide mismatch or a gap in our Smith-Waterman  
95 scoring function. The IMGT isotype references comprised 21 nucleotide-long fragments of the CH1

96 domain of the antibody isotypes. To ensure a high confidence of correct isotype identification, we  
97 employed a conservative threshold of 30 in the Smith-Waterman algorithm scoring function. Sequences  
98 whose Smith-Waterman algorithm score was below the threshold for all isotypes were assigned as  
99 'bulk'. The robustness of this protocol was confirmed on the author-annotated Ig-seq datasets<sup>38-40</sup>  
100 where it resulted in 99% accurate annotations. Around 1% of the Ig-seq data had a very short (or  
101 missing) sequence of CH1 domain. Such sequences were also assigned as 'bulk'.

102

103 IgBlastn<sup>41</sup> was used to convert the FASTA files of antibody nucleotide sequences to amino acids. The  
104 amino acid sequences were then numbered with ANARCI<sup>42</sup> using the IMGT scheme<sup>43</sup>. ANARCI does not  
105 number a sequence if it does not align to a suitable Hidden Markov Model<sup>44</sup>. ANARCI therefore ensures  
106 that antibody sequences do not harbor unusual indels or stop codons in the antibody regions, that V and  
107 J genes align to respective species amino acid IMGT germlines<sup>36</sup>, and that the length of CDR-H3 is not  
108 greater than 37 residues in human, mouse, rat, rabbit, alpaca and rhesus antibodies. Due to technical  
109 limitations of sequencing platforms, certain reads were missing significant portions of the variable  
110 region (e.g. portions of CDR1), sequences that did not have all three CDRs were discarded as incomplete.  
111 The V and J genes are identified during the ANARCI numbering step.

112

113 Using the protocol above we annotated Ig-seq results of 53 independent studies. In order to streamline  
114 updating OAS with new data, we have generated a procedure to automatically identify Ig-seq datasets  
115 from raw sequence read archives. We apply our antibody annotation protocol to each raw nucleotide  
116 dataset deposited in the NCBI/ENA repositories, if we find more than 10,000 antibody sequences in any  
117 given dataset, it is set aside for manual inspection. It is still necessary to manually inspect raw datasets  
118 to efficiently assign metadata as these are currently deposited in a non-standardized manner. This  
119 procedure allows for automatic identification of new Ig-seq datasets, which will enable us to semi  
120 automatically update OAS.

121

### 122 **3. Results**

123

124 We collected raw sequencing outputs from 53 Ig-seq studies. All raw nucleotide reads were converted  
125 into amino acids using IgBlastn<sup>41</sup>. The full amino acid sequences were then IMGT numbered using  
126 ANARCI<sup>42</sup>. As well as providing IMGT and gene annotations, ANARCI acts as a broad-brush filter of  
127 antibody sequences that are likely to be erroneous (see Materials and Methods). Applying the same

128 retrieval, amino acid conversion, gene annotation and numbering protocol to all sequences assures the  
 129 same point of reference across the 53 heterogeneous Ig-seq datasets<sup>45</sup>. This protocol produces the full  
 130 IMGT-numbered sequences together with gene annotations for each of the 53 datasets.  
 131

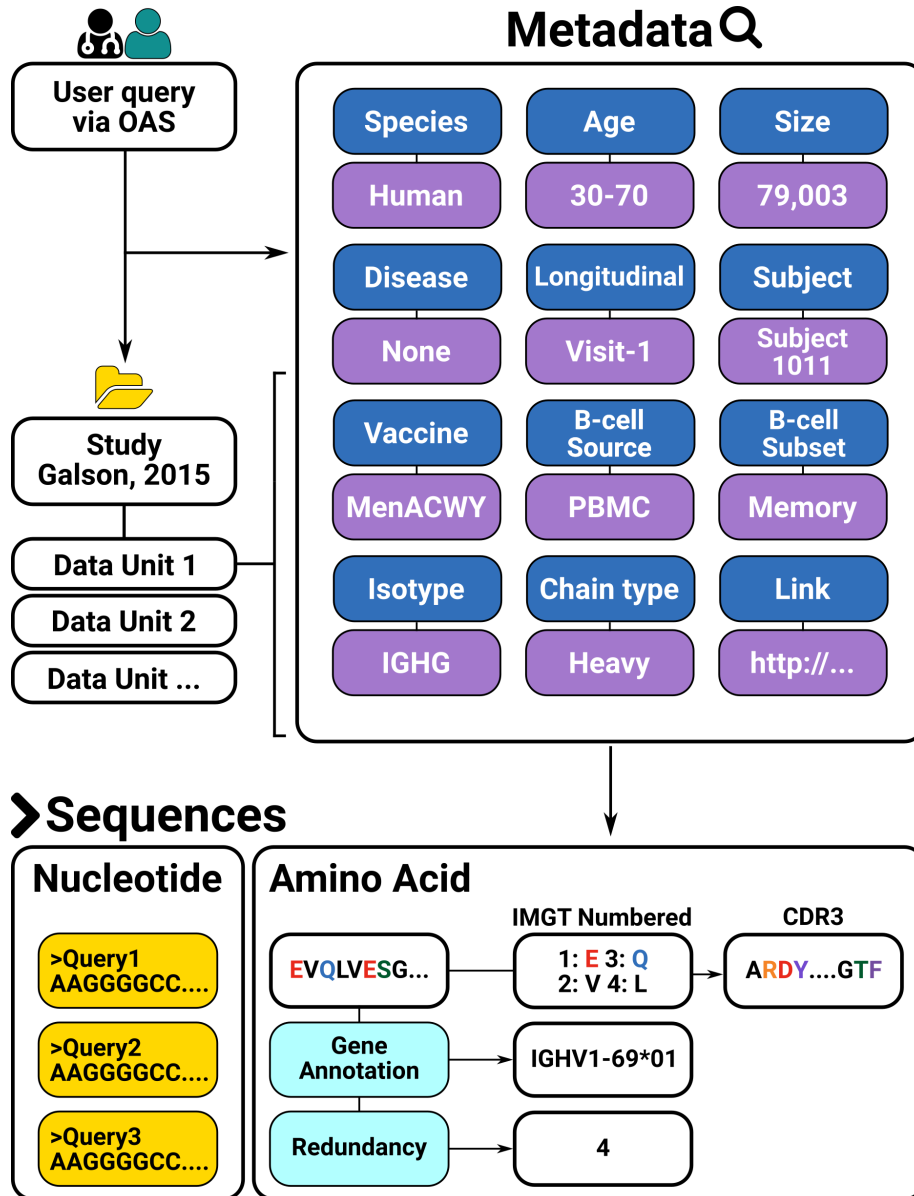

132  
 133 **Figure 1. The Observed Antibody Space database.** The data from 53 studies is sorted into Data  
 134 Units. Each Data Unit is a set of antibody sequences that share the same set of meta-data. Each  
 135 sequence in a Data Unit is further associated with sequence-specific annotations.

136  
 137

138 The numbered amino acid sequences in each dataset are sorted by metadata e.g. individuals, age,  
139 vaccination regime, B-cell type and source *etc.* (Figure 1). Deposition of such metadata is currently not  
140 standardized and requires *ad hoc* manual curation for each dataset. In an effort to organize the antibody  
141 sequences using such metadata, we have grouped the sequences within each dataset into Data Units.  
142 Each Data Unit represents a group of sequences within a given dataset with a unique combination of  
143 metadata values. The metadata values are summarized in Table 1.  
144

| Metadata name | Metadata description                                                               |
|---------------|------------------------------------------------------------------------------------|
| Chain         | Heavy/light chain annotation.                                                      |
| Isotype       | Identified or deposited isotype information.                                       |
| Age           | Information on the age of the human B-cell donors.                                 |
| Disease       | Indication of whether the donor was sick at the time of B-cell extraction.         |
| Vaccine       | Indication if the B-cell donor was purposely immunized prior to B-cell extraction. |
| B-cell subset | Indication if a particular B-cell subset was sorted for Ig-seq                     |
| Species       | Organism of the B-cell donor                                                       |
| B-cell source | Which organ/tissue the B-cells were extracted from.                                |
| Subject       | Indication of a particular B-cell donor the B-cells were sourced from.             |
| Longitudinal  | If the study was longitudinal, an indicator of the time point.                     |
| Size          | Number of non-redundant sequences in the dataset.                                  |
| Link          | Link to the source publication.                                                    |

145 Table 1. Metadata descriptors of each Data Unit in OAS. Each Data Unit is uniquely identified by the  
146 study and a collection of the metadata values.

147  
148  
149  
150  
151  
152  
153  
154

155 As of April 29<sup>th</sup> 2018, 53 Ig-seq studies are included in OAS totaling 608,651,423 sequences (552,824,460  
156 VH and 55,826,963 VL sequences). The majority of these sequences are murine (~50.4%) and human  
157 (~47.4%). Twenty-two of the Ig-seq studies interrogate the immune system of diseased individuals, the  
158 most common ailment being HIV (13 studies). The database also contains 22 Ig-seq studies of the naive  
159 antibody gene repertoires (the collection of B-cells from donors who are healthy and not purposefully  
160 vaccinated). The main source of B-cells in the OAS database is peripheral blood (~231m of sequences)  
161 followed by spleen/splenocytes (~198m) and bone marrow (~124m). The database holds isotype  
162 information for each individual heavy sequence and the two most common isotypes are IgM (~312m)  
163 and IgG (~139m). For ~65m sequences we were not able to assign isotypes with high confidence. The  
164 median total redundant size of the Ig-seq studies in the OSA database is 2,006,196 sequences, while the  
165 largest Ig-seq study was that by Greiff et al., (246,449,189 redundant sequences)<sup>14</sup>. Detailed statistics on  
166 each dataset are given in Table 2. All the data may be bulk downloaded or individual Data Units queried,  
167 at <http://antibodymap.org>.

168

169

170

171

172

173

174

175

176

177

178

179

180

181

182

183

184

185

| Study                                 | Species                    | Disease  | Vaccine                         | B-cell source          | B-cell subset                                       | Total ANARCI parsed sequences |
|---------------------------------------|----------------------------|----------|---------------------------------|------------------------|-----------------------------------------------------|-------------------------------|
| Banerjee et al., <sup>46</sup>        | Rabbit                     | None     | HIV                             | PBMC                   | Unsorted                                            | 4,334,088<br>(2,926,727)      |
| Bashford-Rogers et al., <sup>47</sup> | Human                      | CLL/None | None                            | PBMC                   | Unsorted                                            | 129,013<br>(86,166)           |
| Bhiman et al., <sup>48</sup>          | Human                      | HIV      | None                            | PBMC                   | Unsorted                                            | 785,751<br>(187,067)          |
| Bonsignori et al., <sup>49</sup>      | Human                      | HIV/None | None                            | PBMC                   | Memory/<br>Unsorted                                 | 210,377<br>(57,374)           |
| Collins et al., <sup>50</sup>         | Mouse                      | None     | None                            | Splenocytes            | Unsorted                                            | 812,439<br>(194,752)          |
| Corcoran et al., <sup>51</sup>        | Human/<br>Mouse/<br>Rhesus | None     | None                            | PBMC                   | Unsorted                                            | 5,307,880<br>(2,840,877)      |
| Cui et al., <sup>52</sup>             | Mouse                      | None     | NP-CGG/None                     | Splenocytes            | Memory                                              | 5,513,816<br>(935,646)        |
| Doria-Rose et al., <sup>13</sup>      | Human                      | HIV      | None                            | PBMC                   | Unsorted                                            | 2,164,901<br>(549,544)        |
| Fisher et al., <sup>53</sup>          | Mouse                      | None     | Plasmodium                      | Spleen                 | Unsorted                                            | 175,015<br>(113,594)          |
| Galson et al., <sup>38</sup>          | Human                      | None     | Hepatitis-B                     | PBMC                   | Unsorted/<br>Plasma cells/<br>HepB-specific         | 21,755,739<br>(10,442,291)    |
| Galson et al., <sup>39</sup>          | Human                      | None     | Hepatitis-B                     | PBMC                   | Unsorted/<br>Plasma cells/<br>HepB-specific         | 26,687,394<br>(14,343,236)    |
| Galson et al., <sup>21</sup>          | Human                      | None     | Meningitis                      | PBMC                   | Naïve/<br>Plasma cells/<br>Memory/<br>Marginal zone | 7,918,197<br>(3,282,907)      |
| Galson et al., <sup>17</sup>          | Human                      | None     | Flu                             | PBMC                   | Plasma cells                                        | 13,685,210<br>(5,065,786)     |
| Greiff et al., <sup>40</sup>          | Mouse                      | None     | NP-CGG                          | Bone marrow/<br>Spleen | Plasma cells/<br>Plasmablasts                       | 7,955,739<br>(2,891,649)      |
| Greiff et al., <sup>33</sup>          | Mouse                      | None     | NP-CGG                          | Spleen                 | ASCs/Plasma<br>cells/<br>Naïve                      | 788,787<br>(523,716)          |
| Greiff et al., <sup>14</sup>          | Mouse                      | None     | OVA/Hepatitis-B/<br>NP-HEL/None | Spleen/<br>Bone marrow | Plasma cells/<br>Pre-B-cells/<br>Naïve              | 246,449,189<br>(129,417,638)  |
| Gupta et al., <sup>54</sup>           | Human                      | None     | Flu/Hepatitis-A/<br>Hepatitis-B | PBMC                   | Unsorted                                            | 25,134,322<br>(9,966,175)     |
| Halliley et al., <sup>55</sup>        | Human                      | None     | Flu/Tetanus                     | Bone marrow            | Plasma cells                                        | 2,348,164<br>(1,208,616)      |
| Huang et al., <sup>56</sup>           | Human                      | HIV      | None                            | PBMC                   | Memory                                              | 11,693,783<br>(5,701,433)     |
| Jiang et al., <sup>57</sup>           | Human                      | None     | Flu                             | PBMC                   | Naïve/<br>Plasmablasts                              | 3,199,271<br>(1,809,306)      |
| Joyce et al., <sup>58</sup>           | Human                      | None     | None                            | PBMC                   | Unsorted                                            | 2,747,688<br>(1,463,421)      |
| Khan et al., <sup>59</sup>            | Mouse                      | None     | OVA                             | Spleen                 | Unsorted                                            | 24,175,033<br>(7,113,411)     |
| Levin et al., <sup>60</sup>           | Human                      | Allergy  | None                            | PBMC/<br>Nasal biopsy  | Unsorted                                            | 528,173<br>(370,465)          |
| Levin et al., <sup>61</sup>           | Human                      | Allergy  | None                            | PBMC/                  | Unsorted                                            | 29,643,305                    |



|                                     |        |                                                 |                                         |                                                                                                       |                                                                 |                            |
|-------------------------------------|--------|-------------------------------------------------|-----------------------------------------|-------------------------------------------------------------------------------------------------------|-----------------------------------------------------------------|----------------------------|
|                                     |        |                                                 |                                         | Bone marrow                                                                                           |                                                                 | (9,557,586)                |
| Li et al., <sup>62</sup>            | Camel  | None                                            | None                                    | PBMC                                                                                                  | Unsorted                                                        | 1,152,359<br>(1,127,651)   |
| Liao et al., <sup>63</sup>          | Human  | HIV                                             | None                                    | PBMC                                                                                                  | Unsorted                                                        | 1,420,314<br>(619,492)     |
| Lindner et al., <sup>64</sup>       | Mouse  | None                                            | E.Coli/<br>Clostridia/<br>Lactobacillus | Biopsy of small<br>intestine                                                                          | Unsorted                                                        | 1,686,350<br>(544,061)     |
| Meng et al., <sup>65</sup>          | Human  | CMV/<br>EBV/None                                | None                                    | PBMC/Lung/<br>Spleen/Bone<br>marrow/Colon/<br>Jejunum/Lymph<br>node/Ileum                             | Unsorted                                                        | 45,576,606<br>(21,738,501) |
| Menzel et al., <sup>66</sup>        | Mouse  | None                                            | NP-CGG                                  | Spleen/Bone<br>marrow                                                                                 | ASCs                                                            | 14,355,151<br>(6,058,480)  |
| Mroczek et al., <sup>67</sup>       | Human  | None                                            | None                                    | PBMC                                                                                                  | Immature/<br>Transitional/<br>Mature/<br>Plasmacytes/<br>Memory | 104,154<br>(85,525)        |
| Ota et al., <sup>68</sup>           | Mouse  | None                                            | None                                    | Spleen/Lymph                                                                                          | Unsorted                                                        | 21,505<br>(9,619)          |
| Palanichamy et al., <sup>69</sup>   | Human  | MS                                              | None                                    | CSF/PBMC                                                                                              | Unsorted                                                        | 776,895<br>(292,801)       |
| Parameswaran et al., <sup>11</sup>  | Human  | Dengue/None<br>/ Non-dengue<br>febrile illness/ | None                                    | PBMC                                                                                                  | Unsorted                                                        | 26,584<br>(23,606)         |
| Prohaska et al., <sup>70</sup>      | Mouse  | None                                            | None                                    | Spleen/<br>Peritoneum                                                                                 | B-1/ B-2/<br>Marginal Zone/<br>Follicular                       | 336,723<br>(198,983)       |
| Rettig et al., <sup>32</sup>        | Mouse  | None                                            | None                                    | Spleen/<br>Splenocytes                                                                                | Unsorted                                                        | 41,908<br>(24,908)         |
| Rubelt et al., <sup>71</sup>        | Human  | None                                            | None                                    | PBMC                                                                                                  | Naïve/Memory                                                    | 2,320,947<br>(1,719,507)   |
| Schanz et al., <sup>31</sup>        | Human  | HIV/None                                        | None                                    | PBMC                                                                                                  | Unsorted                                                        | 12,734,958<br>(5,412,549)  |
| Zhu et al., <sup>72</sup>           | Human  | HIV                                             | None                                    | PBMC                                                                                                  | Unsorted                                                        | 1,962,643<br>(532,350)     |
| Stern et al., <sup>73</sup>         | Human  | MS                                              | None                                    | Cervical lymph<br>node/<br>White matter<br>lesion/ Pia<br>mater/ Choroid<br>plexus/ Cortex/<br>Spleen | Unsorted                                                        | 8,550,247<br>(3,321,530)   |
| Sundling et al., <sup>74</sup>      | Rhesus | None                                            | HIV                                     | PBMC                                                                                                  | Unsorted                                                        | 40,960<br>(26,298)         |
| Tipton et al., <sup>75</sup>        | Human  | SLE/None                                        | Flu/Tetanus                             | PBMC                                                                                                  | Unsorted                                                        | 28,204,742<br>(13,301,396) |
| Turchaninova et al., <sup>76</sup>  | Human  | None                                            | None                                    | PBMC                                                                                                  | Memory/Plasma<br>cells/Naive                                    | 183,949<br>(176,441)       |
| Vander Heiden et al., <sup>77</sup> | Human  | MG/None                                         | None                                    | PBMC                                                                                                  | Memory/Naïve/<br>Unsorted                                       | 13,939,166<br>(5,170,299)  |
| VanDuijn et al., <sup>78</sup>      | Rat    | None                                            | DNP/HuD                                 | Splenocytes                                                                                           | Unsorted                                                        | 6,359,396<br>(4,234,597)   |
| Vergani et al., <sup>79</sup>       | Human  | None                                            | None                                    | PBMC                                                                                                  | Unsorted                                                        | 14,161,949<br>(5,987,086)  |

|                                |       |               |        |                                           |          |                          |
|--------------------------------|-------|---------------|--------|-------------------------------------------|----------|--------------------------|
| Wasemann et al., <sup>80</sup> | Mouse | None          | NP-CGG | Lamina propria/<br>Bone marrow/<br>Spleen | Unsorted | 146,370<br>(40,132)      |
| Wu et al., <sup>81</sup>       | Human | HIV           | None   | PBMC                                      | Unsorted | 394,144<br>(198,468)     |
| Wu et al., <sup>82</sup>       | Human | HIV           | None   | PBMC                                      | Unsorted | 5,545,910<br>(1,370,109) |
| Wu et al., <sup>83</sup>       | Human | Allergy/ None | None   | PBMC/<br>Nasal biopsy                     | Unsorted | 35,034<br>(23,923)       |
| Zhou et al., <sup>22</sup>     | Human | HIV           | None   | PBMC                                      | Unsorted | 1,541,645<br>(458,227)   |
| Zhou et al., <sup>84</sup>     | Human | HIV           | None   | PBMC                                      | Unsorted | 722,112<br>(291,670)     |
| Zhu et al., <sup>85</sup>      | Human | HIV           | None   | PBMC                                      | Unsorted | 874,930<br>(174,435)     |
| Zhu et al., <sup>86</sup>      | Human | HIV           | None   | PBMC                                      | Unsorted | 1,290,499<br>(699,828)   |

186 **Table 2. Summary of Ig-seq studies that are incorporated into the Observed Antibody Space database.**

187 We organized the datasets among studies related to a given Ig-seq experiment. Each study in the OAS  
188 database is subdivided into Data Units. Each Data Unit is a collection of IMGT-numbered amino acid  
189 sequences uniquely identified by the metadata descriptors given in Table 1, five of which (species,  
190 disease, vaccine, B-cell source and B-cell type) are given in this Table. The ‘total ANARCI parsed  
191 sequences’ field indicates the total number of redundant sequences in our database, with the non-  
192 redundant numbers in parentheses. Abbreviations: PBMC, peripheral blood mononuclear cell; CLL,  
193 chronic lymphocytic leukemia; NP-CGG, chicken gamma globulin; ASC, antibody secreting cell; OVA,  
194 ovalbumin; NP-HEL, hen egg lysozyme; CSF, cerebrospinal fluid; MS, multiple sclerosis; SLE, systemic  
195 lupus erythematosus; MG, myasthenia gravis; DNP, dinitrophenyl; HuD, paraneoplastic  
196 encephalomyelitis antigen.

197  
198  
199  
200  
201  
202  
203  
204  
205  
206  
207  
208

## 209 4. Discussion

210  
211 Here, we describe the Observed Antibody Space (OAS) database, a unified repository to facilitate large-  
212 scale data mining of antibody repertoires in both their amino acid and nucleotide forms. Absence of well  
213 established repositories in Ig-seq deposition space required us to perform a combination of literature  
214 search and manual curation of the datasets in order to organize the data into OAS. The current lack of  
215 widely-adopted deposition standards hampers automatic updating of OAS, as datasets where we find  
216 large number of antibodies still require manual curation to perform metadata annotation correctly.  
217 Hopefully, efforts such as that by the AIRR community will result in standardization of Ig-seq outputs  
218 and will further streamline deposition procedures facilitating large-scale data mining of antibody  
219 repertoires<sup>24</sup>. Devising unified antibody repertoire repositories is challenging due to both the size of the  
220 datasets as well as the diverse data descriptors and analytical pipelines desired by bioinformaticians,  
221 wetlab scientists and clinicians<sup>33</sup>.

222  
223 OAS is the first organized collection of a large body of Ig-seq outputs. In order to allow comparative  
224 bioinformatics analyses across different subsets of the antibody repertoires, we have annotated the  
225 datasets by commonly used metadata descriptions such as organism, isotype, B-cell type and source,  
226 and the immune state of B-cell donors. To facilitate research about particular antibody sequences or  
227 regions, we make full IMGT-numbered high-quality amino acid sequences available together with gene  
228 annotations, as well as raw nucleotide data.

229  
230 This data should aid in-depth comparative analyses across different studies to discern the commonalities  
231 observed between independent samples as well as directing Ig-seq experiments on not yet interrogated  
232 antibody repertoires. Revealing shared preferences can be invaluable in identifying the portions of the  
233 theoretically allowed antibody space that are strategically used to start an immune response<sup>6</sup>.  
234 Furthermore, such comparative studies can offer a way of deconvoluting the various degrees of freedom  
235 of immune repertoires such as differences between diversity of isotypes<sup>67</sup> or organisms<sup>87</sup>. Charting the  
236 differences between repertoires of human/mouse is of particular interest for engineering better  
237 humanized biotherapeutics<sup>88</sup>.

238  
239 Beyond identifying broad commonalities across repertoires, data mining Ig-seq outputs provides novel  
240 avenues for designing better antibody-based therapeutics. The plethora of currently available Ig-seq

241 data offers a glimpse at a set of sequences that should be able to fold and function in an organism.  
242 Aligning therapeutic candidates to sequences in Ig-seq repertoires can reveal mutational choices that  
243 might be naturally acceptable hence providing shortcuts for antibody engineering such as humanization  
244 <sup>89</sup>. Furthermore, contrasting the naturally observed antibodies with therapeutic ones can offer insight as  
245 to the naturally favored biophysical properties of these molecules <sup>4,90,91</sup>. All such future applications rely  
246 on the availability of well-structured datasets that can offer a unified point of reference for  
247 bioinformatics analyses. We hope that OAS will aid data mining antibody repertoires, help identify  
248 strategic preferences of our immune systems and will ultimately improve how we engineer antibodies  
249 into better therapeutics.  
250

### 251 **Acknowledgment:**

252 We would like to thank all members of Oxford Protein Informatics Group for testing our OAS resource.  
253 In particular, we are grateful to Garret M. Morris and Matthew Raybould for their comments, which  
254 significantly improved the quality of our work.  
255

### 256 **Funding:**

257 This work was supported by funding from Biotechnology and Biological Sciences Research Council  
258 (BBSRC) [BB/M011224/1] and UCB Pharma Ltd awarded to AK.

### 259 **References:**

- 260
- 261 1. Kindt, T. J., Goldsby, R. A., Osborne, B. A. & Kuby, J. *Kuby immunology*. (WH Freeman & Company,  
262 2007).
  - 263 2. Glanville, J. *et al.* Precise determination of the diversity of a combinatorial antibody library gives  
264 insight into the human immunoglobulin repertoire. *Proc. Natl. Acad. Sci. U. S. A.* **106**, 20216–  
265 20221 (2009).
  - 266 3. Kaplon, H. & Reichert, J. M. Antibodies to watch in 2018. *mAbs* 1–21 (2018).  
267 doi:10.1080/19420862.2018.1415671
  - 268 4. Jain, T. *et al.* Biophysical properties of the clinical-stage antibody landscape. *Proc. Natl. Acad. Sci.*  
269 **114**, (2017).
  - 270 5. Miho, E. *et al.* Computational Strategies for Dissecting the High-Dimensional Complexity of  
271 Adaptive Immune Repertoires. *Front. Immunol.* **9**, (2018).

- 272 6. Greiff, V. *et al.* Learning the High-Dimensional Immunogenomic Features That Predict Public and  
273 Private Antibody Repertoires. *J. Immunol.* j11700594 (2017). doi:10.4049/jimmunol.1700594
- 274 7. Kovaltsuk, A. *et al.* How B-Cell Receptor Repertoire Sequencing Can Be Enriched with Structural  
275 Antibody Data. *Front. Immunol.* **8**, 1753 (2017).
- 276 8. Georgiou, G. *et al.* The promise and challenge of high-throughput sequencing of the antibody  
277 repertoire. *Nat. Biotechnol.* **32**, 158–68 (2014).
- 278 9. Friedensohn, S., Khan, T. A. & Reddy, S. T. Advanced Methodologies in High-Throughput  
279 Sequencing of Immune Repertoires. *Trends in Biotechnology* **35**, 203–214 (2017).
- 280 10. Galson, J., Pollard, A. J., Trück, J. & Kelly, D. F. Studying the antibody repertoire after vaccination:  
281 Practical applications. *Trends in Immunology* **35**, 319–331 (2014).
- 282 11. Parameswaran, P. *et al.* Convergent antibody signatures in human dengue. *Cell Host Microbe* **13**,  
283 691–700 (2013).
- 284 12. Ghraichy, M., Galson, J. D., Kelly, D. F. & Trück, J. B-cell receptor repertoire sequencing in patients  
285 with primary immunodeficiency: A review. *Immunology* 145–160 (2017). doi:10.1111/imm.12865
- 286 13. Doria-Rose, N. A. *et al.* Developmental pathway for potent V1V2-directed HIV-neutralizing  
287 antibodies. *Nature* **508**, 55–62 (2014).
- 288 14. Greiff, V. *et al.* Systems Analysis Reveals High Genetic and Antigen-Driven Predetermination of  
289 Antibody Repertoires throughout B Cell Development. *Cell Rep.* **19**, 1467–1478 (2017).
- 290 15. Hoi, K. H. & Ippolito, G. C. Intrinsic bias and public rearrangements in the human immunoglobulin  
291  $\lambda$  light chain repertoire. *Genes Immun.* 1–6 (2013). doi:10.1038/gene.2013.10
- 292 16. Dekosky, B. J. *et al.* In-depth determination and analysis of the human paired heavy- and light-  
293 chain antibody repertoire. *Nat. Med.* **21**, 1–8 (2014).
- 294 17. Galson, J., Trück, J., Kelly, D. F. & van der Most, R. Investigating the effect of AS03 adjuvant on  
295 the plasma cell repertoire following pH1N1 influenza vaccination. *Sci. Rep.* **6**, 37229 (2016).
- 296 18. Galson, J. *et al.* B cell repertoire dynamics after sequential Hepatitis B vaccination, and evidence  
297 for cross-reactive B cell activation. *Submitt. Manuscr.* 1–13 (2016). doi:10.1186/s13073-016-  
298 0322-z
- 299 19. Jackson, K. J. L. *et al.* Human responses to influenza vaccination show seroconversion signatures  
300 and convergent antibody rearrangements. *Cell Host Microbe* **16**, 105–114 (2014).
- 301 20. Lee, J. *et al.* Molecular-level analysis of the serum antibody repertoire in young adults before and  
302 after seasonal influenza vaccination. *Nat Med* **22**, 1456–1464 (2016).
- 303 21. Galson, J. *et al.* BCR repertoire sequencing: Different patterns of B-cell activation after two

- 304 Meningococcal vaccines. *Immunol. Cell Biol.* **93**, 885–895 (2015).
- 305 22. Zhou, T. *et al.* Multidonor analysis reveals structural elements, genetic determinants, and  
306 maturation pathway for HIV-1 neutralization by VRC01-class antibodies. *Immunity* **39**, 245–258  
307 (2013).
- 308 23. DeKosky, B. J. *et al.* High-throughput sequencing of the paired human immunoglobulin heavy and  
309 light chain repertoire. *Nat. Biotechnol.* **31**, 166–9 (2013).
- 310 24. Rubelt, F. *et al.* Adaptive Immune Receptor Repertoire Community recommendations for sharing  
311 immune-repertoire sequencing data. *Nature Immunology* **18**, 1274–1278 (2017).
- 312 25. Breden, F. *et al.* Reproducibility and Reuse of Adaptive Immune Receptor Repertoire Data. *Front.*  
313 *Immunol.* **8**, 1418 (2017).
- 314 26. Bhattacharya, S. *et al.* ImmPort: Disseminating data to the public for the future of immunology.  
315 *Immunol. Res.* **58**, 234–239 (2014).
- 316 27. Bhattacharya, S. *et al.* ImmPort, toward repurposing of open access immunological assay data for  
317 translational and clinical research. *Sci. Data* **5**, (2018).
- 318 28. Cowell, L. G. VDJServer: A Cloud-Based Analysis Portal and Data Commons for Immune  
319 Repertoire Sequences and Rearrangements. *Front. Immunol.* **9**, 976 (2018).
- 320 29. Leinonen, R. *et al.* The European nucleotide archive. *Nucleic Acids Res.* **39**, (2011).
- 321 30. NCBI Resource Coordinators. Database Resources of the National Center for Biotechnology  
322 Information. *Nucleic Acids Res.* **45**, D12–D17 (2017).
- 323 31. Schanz, M. *et al.* High-throughput sequencing of human immunoglobulin variable regions with  
324 subtype identification. *PLoS One* **9**, (2014).
- 325 32. Rettig, T. A., Ward, C., Bye, B. A., Pecaut, M. J. & Chapes, S. K. Characterization of the naive  
326 murine antibody repertoire using unamplified high-throughput sequencing. *PLoS One* **13**, (2018).
- 327 33. Greiff, V. *et al.* A bioinformatic framework for immune repertoire diversity profiling enables  
328 detection of immunological status. *Genome Med.* **7**, 49 (2015).
- 329 34. Magoč, T. & Salzberg, S. L. FLASH: Fast length adjustment of short reads to improve genome  
330 assemblies. *Bioinformatics* **27**, 2957–2963 (2011).
- 331 35. HannonLab. FASTX toolkit. *Cold Spring Harbor Laboratory, Cold Spring Harbor, NY* (2014).
- 332 36. Giudicelli, V., Chaume, D. & Lefranc, M.-P. IMGT/GENE-DB: a comprehensive database for human  
333 and mouse immunoglobulin and T cell receptor genes. *Nucleic Acids Res.* **33**, D256-61 (2005).
- 334 37. Smith, T. F. & Waterman, M. S. Identification of common molecular subsequences. *J. Mol. Biol.*  
335 **147**, 195–197 (1981).

- 336 38. Galson, J. D. *et al.* B-cell repertoire dynamics after sequential hepatitis B vaccination and  
337 evidence for cross-reactive B-cell activation. *Genome Med.* **8**, 68 (2016).
- 338 39. Galson, J. *et al.* Analysis of B Cell Repertoire Dynamics Following Hepatitis B Vaccination in  
339 Humans, and Enrichment of Vaccine-specific Antibody Sequences. *EBioMedicine* **2**, 2070–2079  
340 (2015).
- 341 40. Greiff, V. *et al.* Quantitative assessment of the robustness of next-generation sequencing of  
342 antibody variable gene repertoires from immunized mice. *BMC Immunol.* **15**, 40 (2014).
- 343 41. Ye, J., Ma, N., Madden, T. L. & Ostell, J. M. IgBLAST: an immunoglobulin variable domain  
344 sequence analysis tool. *Nucleic Acids Res.* **41**, (2013).
- 345 42. Dunbar, J. & Deane, C. M. ANARCI: Antigen receptor numbering and receptor classification.  
346 *Bioinformatics* **btv552** (2015). doi:10.1093/bioinformatics/btv552
- 347 43. Lefranc, M.-P. *et al.* IMGT unique numbering fro immunoglobulin and T cell receptor variable  
348 domains and Ig superfamily V-like domains. *Dev. Comp. Immunol.* **27**, 55–77 (2003).
- 349 44. Eddy, S. R. Multiple alignment using hidden Markov models. *Proc. Int. Conf. Intell. Syst. Mol. Biol.*  
350 **3**, 114–120 (1995).
- 351 45. Shugay, M. *et al.* Towards error-free profiling of immune repertoires. *Nat. Methods* **11**, 653–5  
352 (2014).
- 353 46. Banerjee, S. *et al.* Evaluation of a novel multi-immunogen vaccine strategy for targeting  
354 4E10/10E8 neutralizing epitopes on HIV-1 gp41 membrane proximal external region. *Virology*  
355 **505**, 113–126 (2017).
- 356 47. Bashford-Rogers, R. J. M. *et al.* Network properties derived from deep sequencing of human B-  
357 cell receptor repertoires delineate B-cell populations. *Genome Res.* **23**, 1874–1884 (2013).
- 358 48. Bhiman, J. N. *et al.* Viral variants that initiate and drive maturation of V1V2-directed HIV-1  
359 broadly neutralizing antibodies. *Nat. Med.* **21**, 1332–1336 (2015).
- 360 49. Bonsignori, M. *et al.* Maturation Pathway from Germline to Broad HIV-1 Neutralizer of a CD4-  
361 Mimic Antibody. *Cell* **165**, 449–463 (2016).
- 362 50. Collins, A. M. *et al.* The mouse antibody heavy chain repertoire is germline-focused and highly  
363 variable between inbred strains. *Philos. Trans. R. Soc. Lond. B. Biol. Sci.* **370**, S41–S52 (2015).
- 364 51. Corcoran, M. M. *et al.* Production of individualized v gene databases reveals high levels of  
365 immunoglobulin genetic diversity. *Nat. Commun.* **7**, (2016).
- 366 52. Cui, A. *et al.* A Model of Somatic Hypermutation Targeting in Mice Based on High-Throughput Ig  
367 Sequencing Data. *J. Immunol.* **197**, 3566–3574 (2016).



- 368 53. Fisher, C. R. *et al.* T-dependent B cell responses to Plasmodium induce antibodies that form a  
369 high-avidity multivalent complex with the circumsporozoite protein. *PLoS Pathog.* **13**, (2017).
- 370 54. Gupta, N. T. *et al.* Hierarchical Clustering Can Identify B Cell Clones with High Confidence in Ig  
371 Repertoire Sequencing Data. *J. Immunol.* **198**, 2489–2499 (2017).
- 372 55. Halliley, J. L. *et al.* Long-Lived Plasma Cells Are Contained within the CD19(-)CD38(hi)CD138(+)  
373 Subset in Human Bone Marrow. *Immunity* **43**, 132–45 (2015).
- 374 56. Huang, J. *et al.* Identification of a CD4-Binding-Site Antibody to HIV that Evolved Near-Pan  
375 Neutralization Breadth. *Immunity* **45**, 1108–1121 (2016).
- 376 57. Jiang, N. *et al.* Lineage structure of the human antibody repertoire in response to influenza  
377 vaccination. *Sci. Transl. Med.* **5**, 171ra19 (2013).
- 378 58. Joyce, M. G. *et al.* Vaccine-Induced Antibodies that Neutralize Group 1 and Group 2 Influenza A  
379 Viruses. *Cell* **166**, 609–623 (2016).
- 380 59. Khan, T. A. *et al.* Accurate and predictive antibody repertoire profiling by molecular amplification  
381 fingerprinting. *Sci. Adv.* **2**, e1501371–e1501371 (2016).
- 382 60. Levin, M. *et al.* Persistence and evolution of allergen-specific IgE repertoires during subcutaneous  
383 specific immunotherapy. *J. Allergy Clin. Immunol.* **137**, 1535–1544 (2016).
- 384 61. Levin, M., Levander, F., Palmason, R., Greiff, L. & Ohlin, M. Antibody-encoding repertoires of  
385 bone marrow and peripheral blood—a focus on IgE. *J. Allergy Clin. Immunol.* **139**, 1026–1030  
386 (2017).
- 387 62. Li, X. *et al.* Comparative analysis of immune repertoires between bactrian Camel’s conventional  
388 and heavy-chain antibodies. *PLoS One* **11**, (2016).
- 389 63. Liao, H. X. *et al.* Co-evolution of a broadly neutralizing HIV-1 antibody and founder virus. *Nature*  
390 **496**, 469–476 (2013).
- 391 64. Lindner, C. *et al.* Diversification of memory B cells drives the continuous adaptation of secretory  
392 antibodies to gut microbiota. *Nat. Immunol.* **16**, 880–888 (2015).
- 393 65. Meng, W. *et al.* An atlas of B-cell clonal distribution in the human body. *Nat. Biotechnol.* **35**, 879–  
394 886 (2017).
- 395 66. Menzel, U. *et al.* Comprehensive evaluation and optimization of amplicon library preparation  
396 methods for high-throughput antibody sequencing. *PLoS One* **9**, (2014).
- 397 67. Mroczek, E. S. *et al.* Differences in the composition of the human antibody repertoire by B cell  
398 subsets in the blood. *Front Immunol* **5**, 96 (2014).
- 399 68. Ota, M. *et al.* Regulation of the B cell receptor repertoire and self-reactivity by BAFF. *J. Immunol.*



- 400           **185**, 4128–36 (2010).
- 401   69.   Palanichamy, A. *et al.* Immunoglobulin class-switched B cells form an active immune axis  
402       between CNS and periphery in multiple sclerosis. *Sci. Transl. Med.* **6**, (2014).
- 403   70.   Prohaska, T. A. *et al.* Massively Parallel Sequencing of Peritoneal and Splenic B Cell Repertoires  
404       Highlights Unique Properties of B-1 Cell Antibodies. *J. Immunol.* **200**, 1702–1717 (2018).
- 405   71.   Rubelt, F. *et al.* Individual heritable differences result in unique cell lymphocyte receptor  
406       repertoires of naïve and antigen-experienced cells. *Nat. Commun.* **7**, (2016).
- 407   72.   Zhu, J. *et al.* Mining the antibodyome for HIV-1-neutralizing antibodies with next-generation  
408       sequencing and phylogenetic pairing of heavy/light chains. *Proc. Natl. Acad. Sci. U. S. A.* **110**,  
409       6470–5 (2013).
- 410   73.   Stern, J. N. H. *et al.* B cells populating the multiple sclerosis brain mature in the draining cervical  
411       lymph nodes. *Sci. Transl. Med.* **6**, (2014).
- 412   74.   Sundling, C. *et al.* Single-Cell and Deep Sequencing of IgG-Switched Macaque B Cells Reveal a  
413       Diverse Ig Repertoire following Immunization. *J. Immunol.* **192**, 3637–3644 (2014).
- 414   75.   Tipton, C. M. *et al.* Diversity, cellular origin and autoreactivity of antibody-secreting cell  
415       population expansions in acute systemic lupus erythematosus. *Nat. Immunol.* **16**, 755–765  
416       (2015).
- 417   76.   Turchaninova, M. A. *et al.* High-quality full-length immunoglobulin profiling with unique  
418       molecular barcoding. *Nat. Protoc.* **11**, 1599–1616 (2016).
- 419   77.   Vander Heiden, J. A. *et al.* Dysregulation of B Cell Repertoire Formation in Myasthenia Gravis  
420       Patients Revealed through Deep Sequencing. *J. Immunol.* **198**, 1460–1473 (2017).
- 421   78.   VanDuijn, M. M., Dekker, L. J., van IJcken, W. F. J., Sillevs Smitt, P. A. E. & Luiders, T. M. Immune  
422       repertoire after immunization as seen by next-generation sequencing and proteomics. *Front.*  
423       *Immunol.* **8**, (2017).
- 424   79.   Vergani, S. *et al.* Novel method for high-throughput full-length IGHV-D-J sequencing of the  
425       immune repertoire from bulk B-cells with single-cell resolution. *Front. Immunol.* **8**, (2017).
- 426   80.   Wesemann, D. R. *et al.* Microbial colonization influences early B-lineage development in the gut  
427       lamina propria. *Nature* **501**, 112–115 (2013).
- 428   81.   Wu, X. *et al.* Focused evolution of HIV-1 neutralizing antibodies revealed by structures and deep  
429       sequencing. *Science* **333**, 1593–602 (2011).
- 430   82.   Wu, X. *et al.* Maturation and diversity of the VRC01-antibody lineage over 15 years of chronic  
431       HIV-1 infection. *Cell* **161**, 480–485 (2015).

- 432 83. Wu, Y. C. B. *et al.* Influence of seasonal exposure to grass pollen on local and peripheral blood IgE  
433 repertoires in patients with allergic rhinitis. *J. Allergy Clin. Immunol.* **134**, 604–612 (2014).
- 434 84. Zhou, T. *et al.* Structural repertoire of HIV-1-neutralizing antibodies targeting the CD4 supersite in  
435 14 donors. *Cell* **161**, 1280–1292 (2015).
- 436 85. Zhu, J. *et al.* Somatic populations of PGT135-137 HIV-1-neutralizing antibodies identified by 454  
437 pyrosequencing and bioinformatics. *Front. Microbiol.* **3**, (2012).
- 438 86. Zhu, J. *et al.* De novo identification of VRC01 class HIV-1-neutralizing antibodies by next-  
439 generation sequencing of B-cell transcripts. *Proc. Natl. Acad. Sci.* **110**, E4088–E4097 (2013).
- 440 87. Schroeder Jr, H. W. Similarity and divergence in the development and expression of the mouse  
441 and human antibody repertoires. *Dev. Comp. Immunol.* **30**, 119–135 (2006).
- 442 88. Zemlin, M. *et al.* Expressed murine and human CDR-H3 intervals of equal length exhibit distinct  
443 repertoires that differ in their amino acid composition and predicted range of structures. *J. Mol.*  
444 *Biol.* **334**, 733–749 (2003).
- 445 89. Olimpieri, P. P., Marcatili, P. & Tramontano, A. Tabhu: Tools for antibody humanization.  
446 *Bioinformatics* **31**, 434–435 (2014).
- 447 90. Lowe, D. *et al.* Aggregation, stability, and formulation of human antibody therapeutics. in 41–61  
448 (2011). doi:10.1016/B978-0-12-386483-3.00004-5
- 449 91. Lauer, T. M. *et al.* Developability index: A rapid in silico tool for the screening of antibody  
450 aggregation propensity. *J. Pharm. Sci.* **101**, 102–115 (2012).
- 451
